# Supplementary material
Source: MDPI journal article supplement (https://www.mdpi.com/2079-6412/12/4/546)
Supplement: s1 [file s1 › coatings-1661491-supplementary.pdf]

Supplementary

# Structural Determination of Pectins by Spectroscopy Methods

Agata Koziol <sup>1</sup>, Kamila Środa-Pomianek <sup>2</sup>, Agata Górniak <sup>3</sup>, Agnieszka Wikiera <sup>4</sup>, Konrad Cyprych <sup>5</sup> and Magdalena Malik <sup>6,\*</sup>

<sup>1</sup> Department of Immunochemistry and Chemistry, Medical University of Wrocław, 50-369 Wrocław, Poland; agata.kozioł@umw.edu.pl

<sup>2</sup> Department of Biophysics and Neuroscience, Wrocław Medical University, 50-367 Wrocław, Poland; kamila.sroda-pomianek@umw.edu.pl

<sup>3</sup> Laboratory of Elemental Analysis and Structural Research, Wrocław Medical University, 50-556 Wrocław, Poland; agata.gorniak@umed.wroc.pl

<sup>4</sup> Department of Biotechnology and General Food Technology, Faculty of Food Technology, 30-149 Krakow, Poland; agnieszka.wikiera@urk.edu.pl

<sup>5</sup> Faculty of Chemistry, Advanced Materials Engineering and Modeling Group, Wrocław University of Science and Technology, 50-370 Wrocław, Poland; konrad.cyprych@pwr.edu.pl

<sup>6</sup> Faculty of Chemistry, Department of Inorganic and Structural Chemistry, Wrocław University of Science and Technology, 50-370 Wrocław, Poland

\* Correspondence: magdalena.malik@pwr.edu.pl

A—PectaSol-C

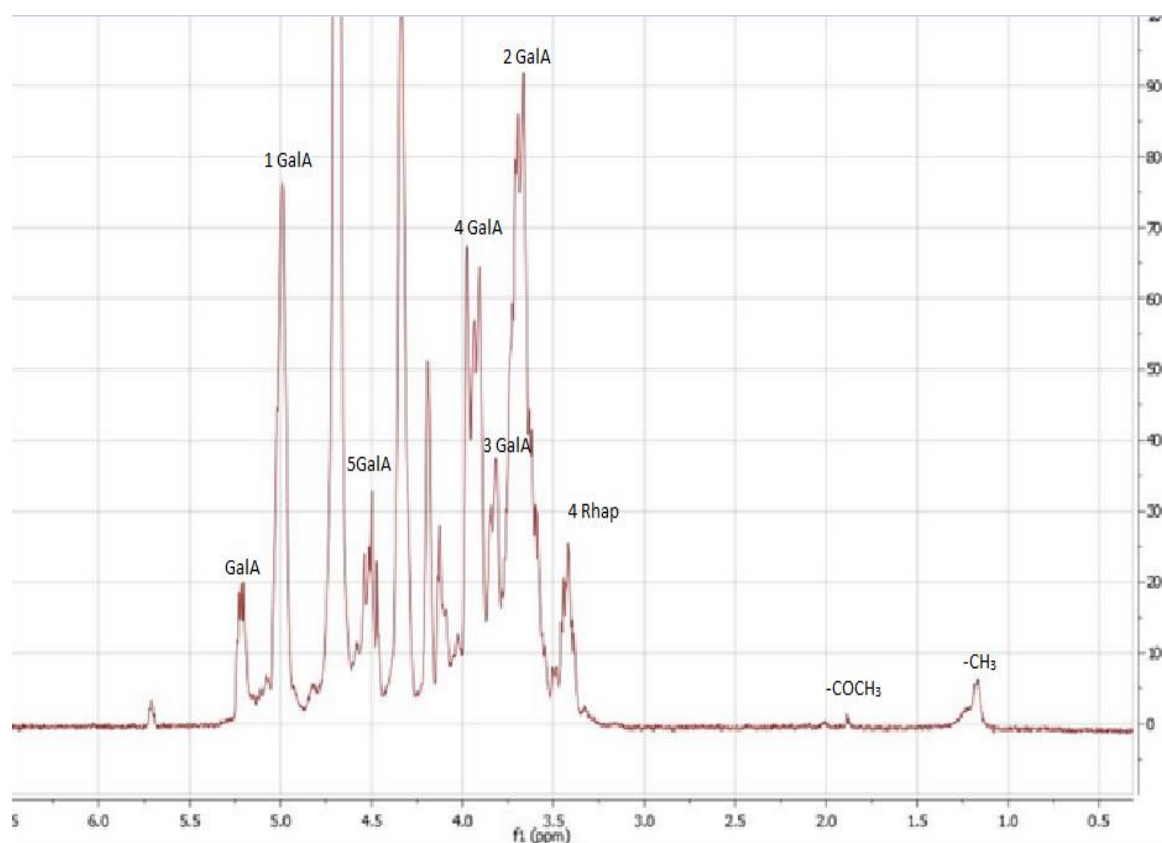

B—xylanase

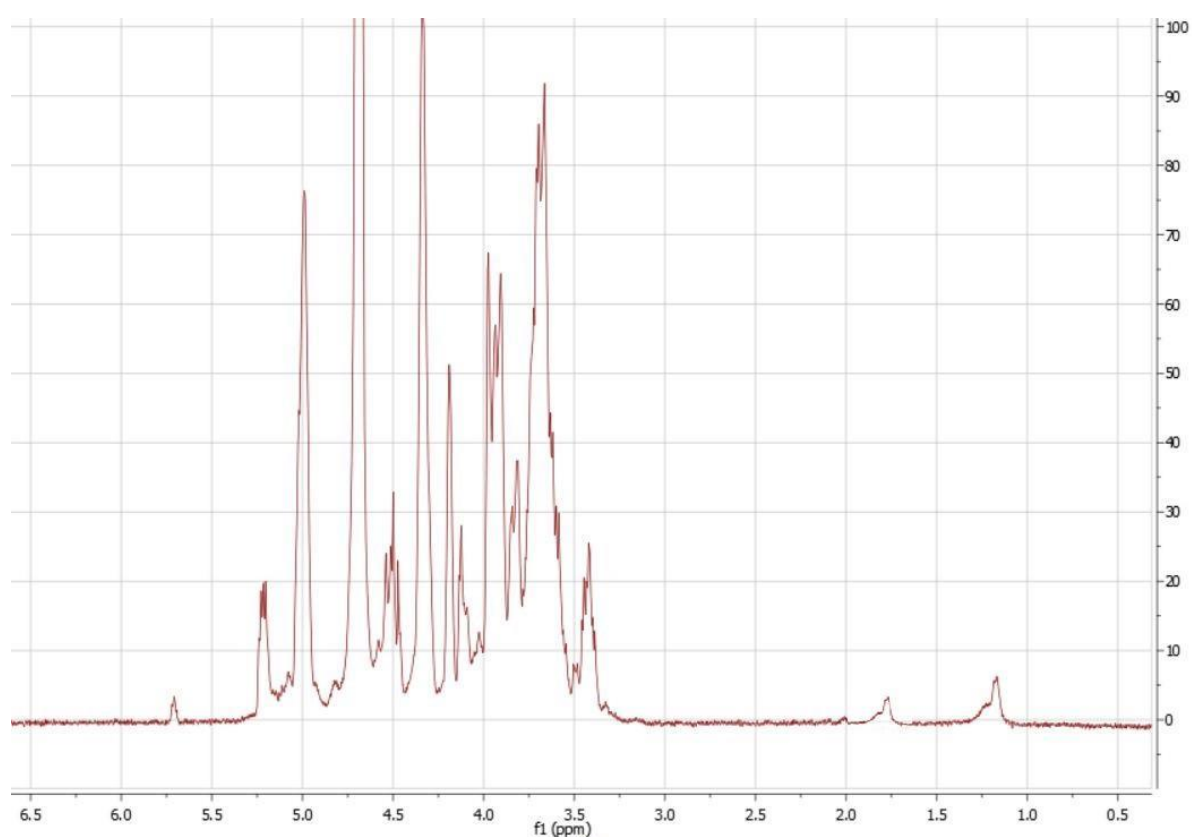

C—cellulose

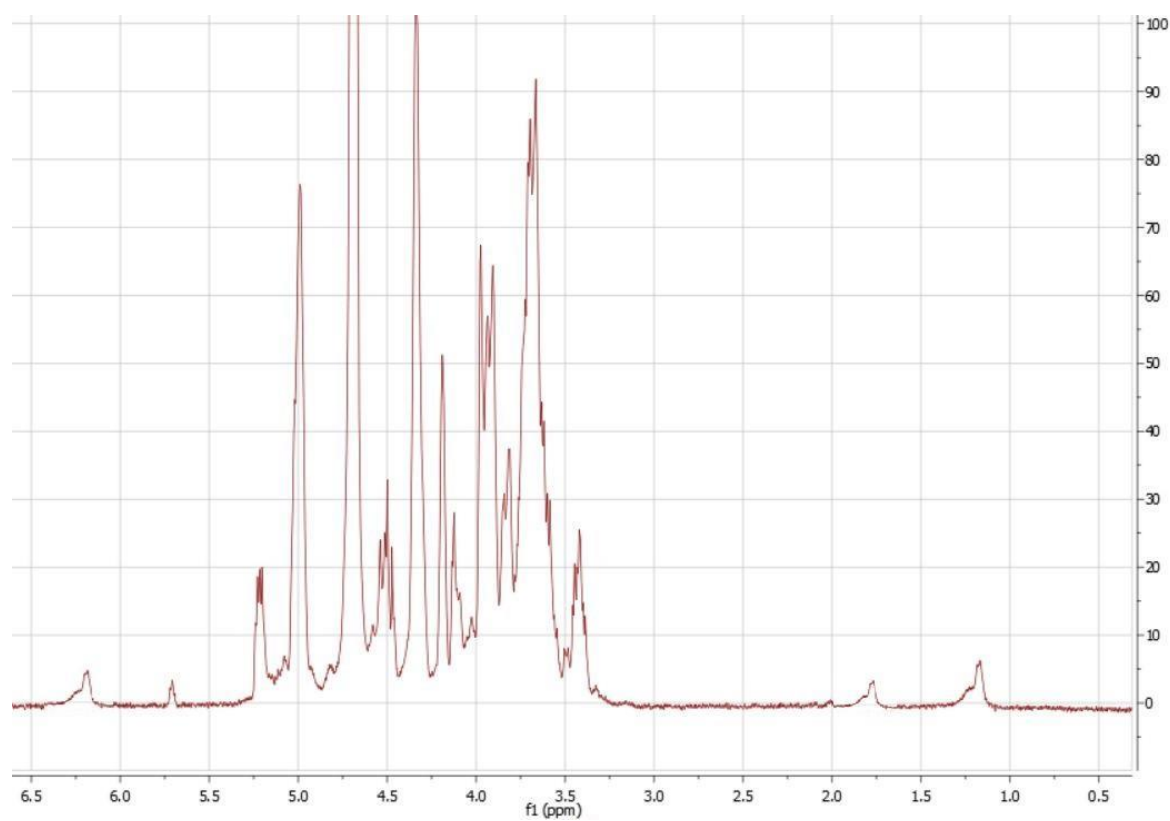

D—mixture of two enzymes

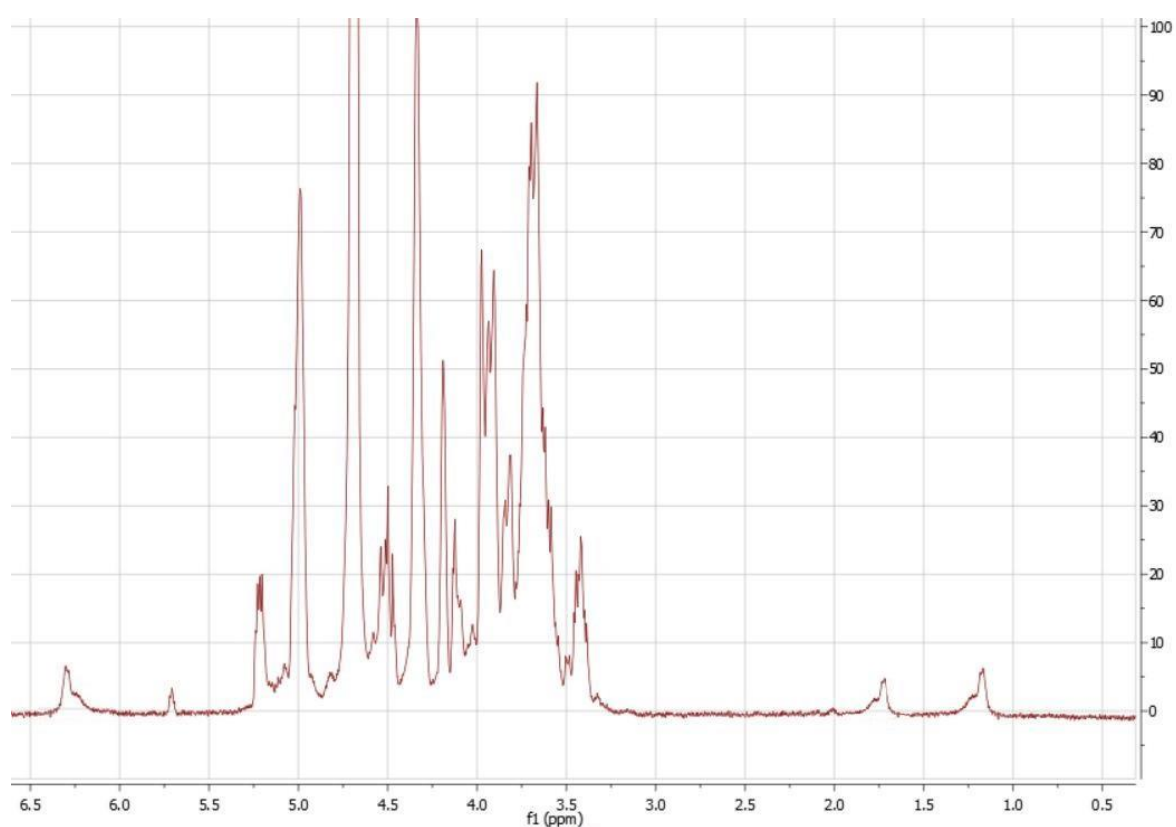

**Figure S1.**  $^1\text{H}$  NMR spectra of pectin extracted from (A) PectaSol-C preparation, (B) xylanase, (C) cellulase and (D) mixture of two enzymes.
